# Supplementary material
Source: ML conference proceedings conference paper supplement (https://openaccess.thecvf.com/content/CVPR2022/html/Biswas_Smooth_Maximum_Unit_CVPR_2022_paper.html)
Supplement: Supplementary file 1 [file Biswas_Smooth_Maximum_Unit_CVPR_2022_supplemental.pdf]

# Smooth Maximum Unit: Smooth Activation Function for Deep Networks using Smoothing Maximum Technique

Koushik Biswas<sup>1</sup>, Sandeep Kumar<sup>1,2</sup>, Shilpak Banerjee<sup>3</sup>, Ashish Kumar Pandey<sup>1</sup>

<sup>1</sup>IIT Delhi <sup>2</sup> Shaheed Bhagat Singh College, University of Delhi <sup>3</sup>IIT Tirupati

{koushikb, ashish.pandey}@iiitd.ac.in, sandeep\_kumar@sbs.du.ac.in, shilpak@iittp.ac.in

## Supplementary Material

Figure 1, 2 represents approximation of ReLU ( $\alpha = 0$ ), Leaky ReLU ( $\alpha = 0.25$ ) by SMU-1 for different values of  $\mu$  and as  $\mu \rightarrow 0$ , SMU-1 overlap ReLU or Leaky ReLU depending on the value of  $\alpha$ . Figure 3 represents the derivatives of SMU-1 for  $\alpha = 0.25$  and different values of  $\mu$ .

There are many known smooth approximation to the  $|x|$  function like  $x \operatorname{erf}(\mu x)$ ,  $\sqrt{x^2 + \mu^2}$ ,  $\frac{x^2}{\sqrt{x^2 + \mu^2}}$  etc. As  $\mu \rightarrow 0$ ,  $\frac{x^2}{\sqrt{x^2 + \mu^2}}$  gives smooth approximation of  $|x|$  from below. We give a plot of well known approximation to  $|x|$  in Figure 4.

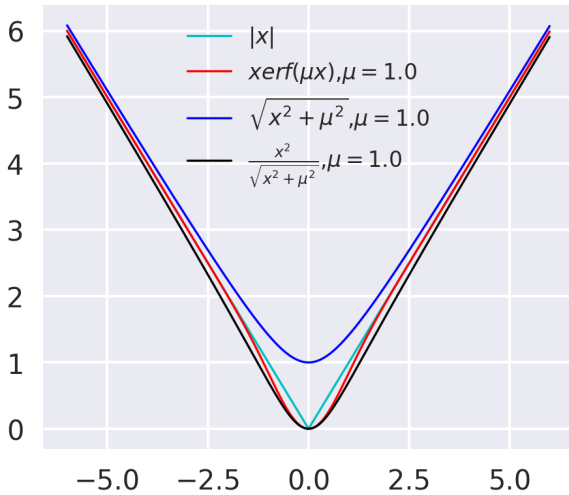

Figure 4. Smooth approximation of  $|x|$

Replace  $x_1 = x$  and  $x_2 = \alpha x$  in equation (3), we have a smooth approximation of Leaky ReLU or Parametric ReLU depending on whether  $\alpha$  is a hyperparameter or a learnable parameter. We call it SMU-1 and is defined as

$$f_2(x, \alpha x; \mu) = \frac{(1 + \alpha)x + \sqrt{(1 - \alpha)^2 x^2 + \mu^2}}{2}$$

and the corresponding derivative with respect to input variable  $x$  is

$$\frac{d}{dx} f_2(x, \alpha x; \mu) = \frac{(1 + \alpha) + \frac{(1 - \alpha)^2 x}{\sqrt{(1 - \alpha)^2 x^2 + \mu^2}}}{2}$$

## A. More results on MNIST, Fashion MNIST, and SVHN datasets

We report more results on MNIST, Fashion MNIST, and SVHN datasets with SMU, SMU-1 and baseline activations with LeNet, AlexNet, and a custom-designed model in Table 4, Table 6, and Table 8 respectively. Our custom homogeneous convolutional neural network has max-pooling layers(thrice), channel depths of size 128 (twice), 64 (thrice), 32 (twice), and a dense layer of size 128. Batch-normalization is applied before the activation function layer. We use  $3 \times 3$  kernels in CNN layers and  $2 \times 2$  kernels in max-pooling layers.

## B. More results on CIFAR10 and CIFAR100

We report more results on CIFAR100 and CIFAR10 datasets with AlexNet, ShuffleNet V1, GoogleNet, Inception V3, DenseNet-121, WideResNet 28-10, squeezeNet, VGG 16, and LeNet architectures in Table 1 and Table 7 respectively. An extension to the Table (2) on CIFAR100 dataset with baseline activations are reported in Table 2 & Table 3 and an extension to Table (3) on CIFAR10 dataset with baseline activations are reported in Table 5 & Table 9.

### B.1. Mixup

We run experiments with Mixup augmentation method on CIFAR100 dataset with ShuffleNet V2 (2.0x), MobileNet V2, AlexNet, Xception, ResNet-50 models and results are reported in Table 10. The results are reported with the same experimental setup is reported in the CIFAR section. From table 10, it is clear that the proposed activations perform better than the baseline activations in all the models.

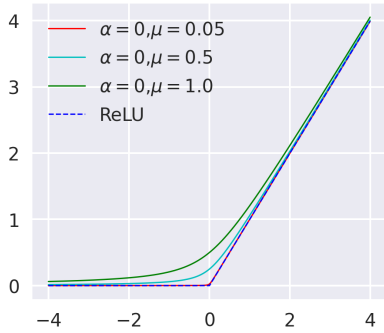

Figure 1. Approximation of ReLU using SMU-1 ( $\alpha = 0$ ) for different values of  $\mu$ . As  $\mu \rightarrow 0$ , SMU-1 smoothly approximate ReLU

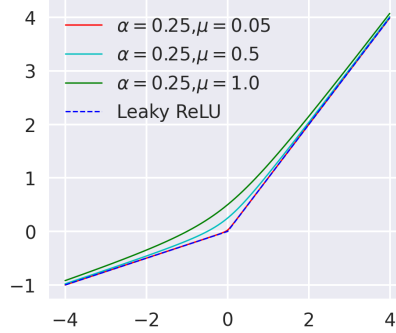

Figure 2. Approximation of Leaky ReLU ( $\alpha = 0.25$ ) using SMU-1 for different values of  $\mu$ . As  $\mu \rightarrow 0$ , SMU-1 smoothly approximate Leaky ReLU

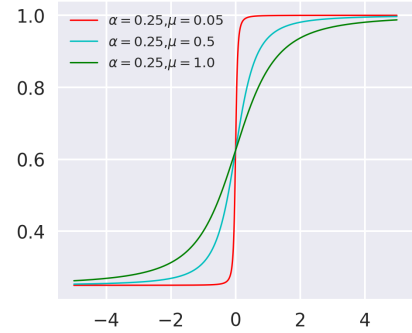

Figure 3. First order derivatives of SMU-1 for  $\alpha = 0.25$  and different values of  $\mu$ .

| Activation Function | Alex Net                   | Shuffle Net V1             | Google Net                 | Inception V3               | Dense Net 121              | WideRes Net 28-10          | Squeeze Net                | VGG 16                     | LeNet                      |
|---------------------|----------------------------|----------------------------|----------------------------|----------------------------|----------------------------|----------------------------|----------------------------|----------------------------|----------------------------|
| SMU                 | <b>61.27</b><br>$\pm 0.21$ | <b>69.15</b><br>$\pm 0.22$ | <b>74.61</b><br>$\pm 0.25$ | <b>77.52</b><br>$\pm 0.24$ | <b>78.57</b><br>$\pm 0.23$ | <b>78.89</b><br>$\pm 0.24$ | <b>68.51</b><br>$\pm 0.24$ | <b>73.26</b><br>$\pm 0.22$ | 47.20<br>$\pm 0.25$        |
| SMU-1               | <b>60.98</b><br>$\pm 0.23$ | <b>68.71</b><br>$\pm 0.22$ | <b>74.29</b><br>$\pm 0.24$ | <b>76.88</b><br>$\pm 0.23$ | <b>78.01</b><br>$\pm 0.24$ | <b>78.30</b><br>$\pm 0.23$ | <b>68.07</b><br>$\pm 0.25$ | <b>72.79</b><br>$\pm 0.23$ | 47.03<br>$\pm 0.24$        |
| ReLU                | 54.89<br>$\pm 0.28$        | 65.79<br>$\pm 0.29$        | 72.52<br>$\pm 0.30$        | 74.12<br>$\pm 0.27$        | 75.81<br>$\pm 0.28$        | 76.45<br>$\pm 0.26$        | 66.22<br>$\pm 0.29$        | 71.87<br>$\pm 0.30$        | 45.54<br>$\pm 0.28$        |
| Leaky ReLU          | 55.26<br>$\pm 0.27$        | 65.99<br>$\pm 0.30$        | 72.42<br>$\pm 0.31$        | 74.49<br>$\pm 0.28$        | 75.93<br>$\pm 0.27$        | 76.61<br>$\pm 0.27$        | 66.15<br>$\pm 0.27$        | 71.92<br>$\pm 0.29$        | 45.77<br>$\pm 0.29$        |
| ReLU6               | 55.89<br>$\pm 0.26$        | 66.19<br>$\pm 0.28$        | 72.47<br>$\pm 0.28$        | 74.51<br>$\pm 0.25$        | 75.98<br>$\pm 0.28$        | 76.71<br>$\pm 0.27$        | 66.39<br>$\pm 0.26$        | 71.95<br>$\pm 0.28$        | 45.79<br>$\pm 0.27$        |
| PReLU               | 55.47<br>$\pm 0.29$        | 65.87<br>$\pm 0.32$        | 72.69<br>$\pm 0.29$        | 74.39<br>$\pm 0.30$        | 76.06<br>$\pm 0.29$        | 76.71<br>$\pm 0.27$        | 66.35<br>$\pm 0.28$        | 71.96<br>$\pm 0.32$        | 45.59<br>$\pm 0.31$        |
| ELU                 | 55.91<br>$\pm 0.26$        | 65.72<br>$\pm 0.28$        | 72.92<br>$\pm 0.28$        | 74.65<br>$\pm 0.26$        | 75.72<br>$\pm 0.25$        | 76.25<br>$\pm 0.26$        | 66.39<br>$\pm 0.28$        | 71.79<br>$\pm 0.30$        | 46.02<br>$\pm 0.28$        |
| Softplus            | 54.99<br>$\pm 0.39$        | 65.11<br>$\pm 0.38$        | 71.81<br>$\pm 0.38$        | 74.25<br>$\pm 0.35$        | 75.19<br>$\pm 0.35$        | 75.42<br>$\pm 0.37$        | 65.73<br>$\pm 0.35$        | 70.92<br>$\pm 0.32$        | 44.12<br>$\pm 0.39$        |
| GELU                | 57.32<br>$\pm 0.26$        | 67.22<br>$\pm 0.25$        | 73.16<br>$\pm 0.26$        | 75.66<br>$\pm 0.26$        | 76.68<br>$\pm 0.26$        | 77.07<br>$\pm 0.25$        | 66.99<br>$\pm 0.29$        | 71.88<br>$\pm 0.27$        | 47.27<br>$\pm 0.25$        |
| Swish               | 57.55<br>$\pm 0.27$        | 67.01<br>$\pm 0.26$        | 73.32<br>$\pm 0.26$        | 75.47<br>$\pm 0.28$        | 76.51<br>$\pm 0.29$        | 77.35<br>$\pm 0.24$        | 66.56<br>$\pm 0.27$        | 71.94<br>$\pm 0.28$        | 47.34<br>$\pm 0.23$        |
| PAU                 | 57.35<br>$\pm 0.29$        | 67.45<br>$\pm 0.28$        | 73.68<br>$\pm 0.27$        | 75.85<br>$\pm 0.31$        | 76.72<br>$\pm 0.28$        | 77.02<br>$\pm 0.26$        | 66.89<br>$\pm 0.24$        | 71.79<br>$\pm 0.25$        | 47.30<br>$\pm 0.29$        |
| Mish                | 58.22<br>$\pm 0.23$        | 67.85<br>$\pm 0.24$        | 73.97<br>$\pm 0.24$        | 76.29<br>$\pm 0.25$        | 77.25<br>$\pm 0.24$        | 77.45<br>$\pm 0.23$        | 67.35<br>$\pm 0.23$        | 72.45<br>$\pm 0.22$        | <b>47.42</b><br>$\pm 0.27$ |

Table 1. Comparison between SMU, SMU-1 activations and other baseline activations on CIFAR100 dataset for image classification problem. We report Top-1 test accuracy (in %) for the mean of 15 different runs. mean $\pm$ std is reported in the table.

### C. ImageNet-1k

We also evaluate the performance of proposed and baseline activation functions on bookmarking the ImageNet-1k dataset. The dataset consists of 1,281,167 training images and 50,000 validation images with 1000 classes. The im-

ages have a resolution of 224 $\times$ 224. Results are reported on Table 11 with ShuffleNet V2 (1.0x) and ResNet-50 models. We use four NVIDIA V100 GPUs with 32GB RAM each to run these experiments. We trained the models up to 600k iterations with a batch size of 256 and SGD optimizer, 0.9 momentum,  $5e^{-4}$  weight decay rate.

| Activation Function | SF V2 0.5x     | SF V2 1.0x     | SF V2 1.5x     | SF V2 2.0x     | SeNet 18       | SeNet 34       | SeNet 50       | Res-Next       | Xception       | EfficientNet B0 |
|---------------------|----------------|----------------|----------------|----------------|----------------|----------------|----------------|----------------|----------------|-----------------|
| Leaky ReLU          | 62.25<br>±0.33 | 65.39<br>±0.34 | 67.39<br>±0.29 | 67.79<br>±0.29 | 74.51<br>±0.23 | 75.14<br>±0.24 | 76.23<br>±0.22 | 74.58<br>±0.23 | 71.01<br>±0.26 | 76.81<br>±0.28  |
| ReLU6               | 62.39<br>±0.30 | 65.71<br>±0.29 | 67.65<br>±0.29 | 68.10<br>±0.26 | 74.69<br>±0.20 | 75.34<br>±0.22 | 76.61<br>±0.21 | 74.65<br>±0.24 | 71.39<br>±0.23 | 76.67<br>±0.24  |
| PReLU               | 62.01<br>±0.34 | 65.10<br>±0.33 | 67.37<br>±0.34 | 67.99<br>±0.29 | 74.39<br>±0.27 | 75.19<br>±0.23 | 76.39<br>±0.24 | 74.48<br>±0.26 | 71.19<br>±0.28 | 76.68<br>±0.30  |
| ELU                 | 62.61<br>±0.30 | 65.60<br>±0.28 | 67.71<br>±0.27 | 67.91<br>±0.31 | 74.79<br>±0.22 | 75.10<br>±0.21 | 76.49<br>±0.23 | 74.69<br>±0.22 | 71.45<br>±0.24 | 76.71<br>±0.30  |
| Softplus            | 61.87<br>±0.35 | 64.45<br>±0.37 | 67.19<br>±0.32 | 68.79<br>±0.30 | 74.36<br>±0.34 | 74.78<br>±0.34 | 75.22<br>±0.37 | 74.31<br>±0.35 | 71.30<br>±0.39 | 76.56<br>±0.36  |
| GELU                | 64.40<br>±0.26 | 66.79<br>±0.23 | 69.79<br>±0.29 | 70.10<br>±0.28 | 74.82<br>±0.19 | 76.20<br>±0.21 | 77.20<br>±0.21 | 75.17<br>±0.24 | 72.07<br>±0.22 | 77.31<br>±0.22  |
| Swish               | 63.79<br>±0.25 | 66.99<br>±0.25 | 69.59<br>±0.27 | 70.29<br>±0.24 | 74.62<br>±0.19 | 75.77<br>±0.22 | 76.89<br>±0.24 | 75.17<br>±0.25 | 72.19<br>±0.21 | 77.17<br>±0.20  |
| PAU                 | 64.10<br>±0.26 | 66.77<br>±0.27 | 69.52<br>±0.25 | 70.54<br>±0.26 | 74.89<br>±0.20 | 75.92<br>±0.24 | 77.10<br>±0.23 | 75.66<br>±0.26 | 72.62<br>±0.27 | 77.41<br>±0.24  |
| Mish                | 64.91<br>±0.24 | 67.78<br>±0.24 | 70.44<br>±0.25 | 71.49<br>±0.22 | 75.32<br>±0.19 | 76.52<br>±0.23 | 77.69<br>±0.23 | 76.20<br>±0.24 | 73.49<br>±0.22 | 78.15<br>±0.22  |

Table 2. This is an extension to the Table-2. We report Top-1 test accuracy (in %) on CIFAR100 dataset for baseline functions for the mean of 15 different runs. mean±std is reported in the table. SF V2 stands for ShuffleNet v2.

| Activation Function | ResNet 18      | ResNet 34      | ResNet 50      | PreAct ResNet 18 | PreAct ResNet 34 | PreAct ResNet 50 | MobileNet V1   | MobileNet V2   |
|---------------------|----------------|----------------|----------------|------------------|------------------|------------------|----------------|----------------|
| Leaky ReLU          | 73.12<br>±0.25 | 73.41<br>±0.28 | 74.19<br>±0.25 | 73.29<br>±0.23   | 73.33<br>±0.24   | 74.02<br>±0.24   | 71.22<br>±0.26 | 74.03<br>±0.25 |
| ReLU6               | 73.35<br>±0.24 | 73.59<br>±0.26 | 74.23<br>±0.23 | 73.47<br>±0.23   | 73.56<br>±0.22   | 74.46<br>±0.23   | 71.56<br>±0.24 | 74.51<br>±0.23 |
| PReLU               | 73.02<br>±0.27 | 73.52<br>±0.29 | 74.32<br>±0.28 | 73.21<br>±0.25   | 73.45<br>±0.26   | 74.29<br>±0.25   | 71.41<br>±0.29 | 74.45<br>±0.30 |
| ELU                 | 73.42<br>±0.24 | 73.68<br>±0.26 | 74.48<br>±0.24 | 73.32<br>±0.20   | 73.49<br>±0.25   | 74.44<br>±0.25   | 71.32<br>±0.24 | 74.22<br>±0.23 |
| Softplus            | 72.86<br>±0.39 | 73.20<br>±0.38 | 74.10<br>±0.40 | 72.99<br>±0.41   | 73.10<br>±0.35   | 73.96<br>±0.38   | 71.04<br>±0.38 | 74.27<br>±0.36 |
| GELU                | 73.89<br>±0.22 | 74.10<br>±0.25 | 75.59<br>±0.22 | 74.98<br>±0.23   | 74.41<br>±0.21   | 74.92<br>±0.22   | 71.74<br>±0.22 | 75.01<br>±0.23 |
| Swish               | 73.68<br>±0.23 | 74.17<br>±0.24 | 75.35<br>±0.24 | 75.12<br>±0.25   | 74.81<br>±0.22   | 75.10<br>±0.21   | 71.92<br>±0.21 | 75.15<br>±0.22 |
| PAU                 | 74.10<br>±0.20 | 74.44<br>±0.22 | 75.87<br>±0.21 | 74.92<br>±0.21   | 74.72<br>±0.19   | 75.68<br>±0.17   | 71.83<br>±0.22 | 75.19<br>±0.19 |
| Mish                | 74.59<br>±0.20 | 74.70<br>±0.21 | 76.22<br>±0.22 | 75.11<br>±0.23   | 75.34<br>±0.21   | 76.98<br>±0.19   | 72.24<br>±0.20 | 75.45<br>±0.20 |

Table 3. This is an extension to the Table-2. We report Top-1 test accuracy (in %) on CIFAR100 dataset for baseline functions for the mean of 15 different runs. mean±std is reported in the table.

| Activation Function | MNIST                   | Fashion MNIST           | SVHN                    |
|---------------------|-------------------------|-------------------------|-------------------------|
| ReLU                | 99.16 $\pm$ 0.11        | 91.42 $\pm$ 0.18        | 92.10 $\pm$ 0.21        |
| Leaky ReLU          | 99.12 $\pm$ 0.12        | 91.43 $\pm$ 0.22        | 92.27 $\pm$ 0.20        |
| ReLU6               | 99.21 $\pm$ 0.10        | 91.47 $\pm$ 0.19        | 92.28 $\pm$ 0.16        |
| PReLU               | 99.23 $\pm$ 0.10        | 91.40 $\pm$ 0.20        | 92.09 $\pm$ 0.20        |
| ELU                 | 99.30 $\pm$ 0.10        | 91.41 $\pm$ 0.21        | 92.28 $\pm$ 0.19        |
| Softplus            | 99.01 $\pm$ 0.19        | 91.11 $\pm$ 0.25        | 91.92 $\pm$ 0.26        |
| GELU                | 99.33 $\pm$ 0.08        | 91.60 $\pm$ 0.13        | 92.47 $\pm$ 0.17        |
| Swish               | 99.29 $\pm$ 0.09        | 91.66 $\pm$ 0.15        | 92.35 $\pm$ 0.20        |
| PAU                 | 99.37 $\pm$ 0.10        | 91.56 $\pm$ 0.14        | 92.37 $\pm$ 0.21        |
| Mish                | 99.36 $\pm$ 0.06        | <b>91.68</b> $\pm$ 0.13 | 92.41 $\pm$ 0.17        |
| SMU                 | <b>99.47</b> $\pm$ 0.04 | 91.58 $\pm$ 0.16        | <b>92.79</b> $\pm$ 0.16 |
| SMU-1               | <b>99.41</b> $\pm$ 0.05 | 91.51 $\pm$ 0.14        | <b>92.66</b> $\pm$ 0.17 |

Table 4. Comparison between SMU, SMU-1 activations and other baseline activations on MNIST, Fashion MNIST, and SVHN datasets for image classification problem on LeNet architecture. We report Top-1 test accuracy (in %) for the mean of 15 different runs. mean $\pm$ std is reported in the table.

| Activation Function | ResNet 18        | ResNet 34        | ResNet 50        | PreAct ResNet 18 | PreAct ResNet 34 | PreAct ResNet 50 | MobileNet V1     | MobileNet V2     |
|---------------------|------------------|------------------|------------------|------------------|------------------|------------------|------------------|------------------|
| Leaky ReLU          | 94.00 $\pm$ 0.25 | 94.18 $\pm$ 0.24 | 94.29 $\pm$ 0.24 | 93.51 $\pm$ 0.20 | 94.29 $\pm$ 0.22 | 94.32 $\pm$ 0.22 | 92.54 $\pm$ 0.21 | 94.10 $\pm$ 0.19 |
| ReLU6               | 94.19 $\pm$ 0.26 | 94.20 $\pm$ 0.25 | 94.26 $\pm$ 0.27 | 93.69 $\pm$ 0.21 | 94.19 $\pm$ 0.25 | 94.52 $\pm$ 0.23 | 92.69 $\pm$ 0.20 | 94.21 $\pm$ 0.20 |
| PReLU               | 94.22 $\pm$ 0.28 | 94.29 $\pm$ 0.29 | 94.17 $\pm$ 0.27 | 93.58 $\pm$ 0.23 | 94.31 $\pm$ 0.25 | 94.48 $\pm$ 0.28 | 92.50 $\pm$ 0.20 | 94.29 $\pm$ 0.23 |
| ELU                 | 94.15 $\pm$ 0.23 | 94.24 $\pm$ 0.22 | 94.20 $\pm$ 0.24 | 93.59 $\pm$ 0.22 | 94.42 $\pm$ 0.24 | 94.45 $\pm$ 0.20 | 92.69 $\pm$ 0.21 | 94.04 $\pm$ 0.19 |
| Softplus            | 93.82 $\pm$ 0.29 | 93.99 $\pm$ 0.31 | 93.77 $\pm$ 0.31 | 93.09 $\pm$ 0.28 | 94.01 $\pm$ 0.35 | 94.08 $\pm$ 0.32 | 92.01 $\pm$ 0.32 | 93.91 $\pm$ 0.27 |
| GELU                | 94.38 $\pm$ 0.22 | 94.41 $\pm$ 0.23 | 94.59 $\pm$ 0.23 | 93.70 $\pm$ 0.21 | 94.24 $\pm$ 0.25 | 94.69 $\pm$ 0.23 | 92.81 $\pm$ 0.20 | 94.20 $\pm$ 0.16 |
| Swish               | 94.31 $\pm$ 0.21 | 94.32 $\pm$ 0.20 | 94.64 $\pm$ 0.22 | 93.80 $\pm$ 0.21 | 94.14 $\pm$ 0.24 | 94.61 $\pm$ 0.23 | 92.69 $\pm$ 0.22 | 94.22 $\pm$ 0.17 |
| PAU                 | 94.40 $\pm$ 0.20 | 94.46 $\pm$ 0.22 | 94.59 $\pm$ 0.22 | 93.84 $\pm$ 0.20 | 94.29 $\pm$ 0.22 | 94.73 $\pm$ 0.24 | 93.01 $\pm$ 0.15 | 94.54 $\pm$ 0.13 |
| Mish                | 94.52 $\pm$ 0.23 | 94.39 $\pm$ 0.22 | 94.79 $\pm$ 0.22 | 93.78 $\pm$ 0.22 | 94.51 $\pm$ 0.22 | 94.81 $\pm$ 0.24 | 92.78 $\pm$ 0.20 | 94.77 $\pm$ 0.18 |

Table 5. This is an extension to the Table-3. We report Top-1 test accuracy (in %) on CIFAR10 dataset for baseline functions for the mean of 15 different runs. mean $\pm$ std is reported in the table.

| Activation Function | MNIST               | Fashion MNIST       | SVHN                |
|---------------------|---------------------|---------------------|---------------------|
| ReLU                | 99.48 ± 0.07        | 92.70 ± 0.20        | 95.03 ± 0.16        |
| Leaky ReLU          | 99.47 ± 0.07        | 92.81 ± 0.19        | 95.10 ± 0.18        |
| ReLU6               | 99.52 ± 0.05        | 92.94 ± 0.14        | 95.16 ± 0.14        |
| PReLU               | 99.45 ± 0.09        | 92.79 ± 0.20        | 95.12 ± 0.16        |
| ELU                 | 99.51 ± 0.06        | 92.96 ± 0.15        | 95.19 ± 0.16        |
| Softplus            | 99.27 ± 0.11        | 92.30 ± 0.27        | 94.71 ± 0.20        |
| GELU                | 99.57 ± 0.07        | 93.09 ± 0.12        | 95.20 ± 0.13        |
| Swish               | 99.59 ± 0.06        | 92.90 ± 0.17        | 95.35 ± 0.16        |
| PAU                 | 99.51 ± 0.10        | 93.06 ± 0.18        | 95.29 ± 0.15        |
| Mish                | 99.61 ± 0.06        | 93.12 ± 0.15        | 95.31 ± 0.12        |
| SMU                 | <b>99.68</b> ± 0.04 | <b>93.31</b> ± 0.15 | <b>95.59</b> ± 0.12 |
| SMU-1               | <b>99.65</b> ± 0.05 | <b>93.20</b> ± 0.11 | <b>95.46</b> ± 0.13 |

Table 6. Comparison between SMU, SMU-1 activations and other baseline activations on MNIST, Fashion MNIST, and SVHN datasets for image classification problem on AlexNet architecture. We report Top-1 test accuracy (in %) for the mean of 15 different runs. mean±std is reported in the table.

| Activation Function | Alex Net              | Shuffle Net V1        | Google Net            | Inception V3          | Dense Net 121         | WideRes Net 28-10     | Squeeze Net           | VGG 16                | LeNet                 |
|---------------------|-----------------------|-----------------------|-----------------------|-----------------------|-----------------------|-----------------------|-----------------------|-----------------------|-----------------------|
| SMU                 | <b>87.25</b><br>±0.15 | <b>92.42</b><br>±0.14 | <b>94.10</b><br>±0.17 | <b>95.59</b><br>±0.14 | <b>96.07</b><br>±0.12 | <b>96.23</b><br>±0.14 | <b>91.77</b><br>±0.16 | <b>94.54</b><br>±0.14 | 77.66<br>±0.16        |
| SMU-1               | <b>86.77</b><br>±0.16 | <b>92.01</b><br>±0.15 | <b>93.69</b><br>±0.16 | <b>95.11</b><br>±0.15 | <b>95.65</b><br>±0.12 | <b>95.71</b><br>±0.13 | <b>91.38</b><br>±0.15 | <b>94.32</b><br>±0.15 | 77.39<br>±0.16        |
| ReLU                | 84.10<br>±0.20        | 91.34<br>±0.19        | 92.91<br>±0.18        | 94.04<br>±0.18        | 94.77<br>±0.19        | 95.08<br>±0.21        | 90.59<br>±0.20        | 93.59<br>±0.18        | 75.80<br>±0.21        |
| Leaky ReLU          | 84.22<br>±0.22        | 91.56<br>±0.20        | 92.79<br>±0.17        | 94.29<br>±0.22        | 94.68<br>±0.22        | 95.01<br>±0.20        | 90.71<br>±0.20        | 93.71<br>±0.19        | 75.99<br>±0.20        |
| ReLU6               | 84.79<br>±0.19        | 91.68<br>±0.18        | 92.97<br>±0.16        | 94.21<br>±0.19        | 94.59<br>±0.20        | 95.39<br>±0.20        | 90.87<br>±0.19        | 93.70<br>±0.17        | 75.88<br>±0.18        |
| PReLU               | 84.30<br>±0.24        | 91.74<br>±0.23        | 92.91<br>±0.24        | 94.45<br>±0.20        | 94.59<br>±0.23        | 95.10<br>±0.20        | 90.79<br>±0.23        | 93.58<br>±0.22        | 75.90<br>±0.21        |
| ELU                 | 84.89<br>±0.19        | 91.89<br>±0.18        | 92.99<br>±0.16        | 94.45<br>±0.17        | 94.72<br>±0.18        | 95.23<br>±0.17        | 90.87<br>±0.15        | 93.78<br>±0.16        | 75.88<br>±0.18        |
| Softplus            | 84.01<br>±0.30        | 91.10<br>±0.29        | 92.56<br>±0.32        | 94.17<br>±0.31        | 94.54<br>±0.29        | 94.89<br>±0.28        | 90.55<br>±0.33        | 93.39<br>±0.29        | 75.45<br>±0.35        |
| GELU                | 85.02<br>±0.19        | 91.77<br>±0.18        | 93.36<br>±0.18        | 94.32<br>±0.17        | 94.71<br>±0.20        | 95.19<br>±0.18        | 90.89<br>±0.16        | 93.64<br>±0.16        | 77.71<br>±0.19        |
| Swish               | 85.19<br>±0.18        | 91.49<br>±0.20        | 93.26<br>±0.19        | 94.40<br>±0.19        | 94.69<br>±0.17        | 95.47<br>±0.17        | 91.12<br>±0.19        | 93.68<br>±0.17        | 77.70<br>±0.18        |
| PAU                 | 84.91<br>±0.20        | 91.95<br>±0.21        | 93.20<br>±0.19        | 94.32<br>±0.23        | 94.50<br>±0.22        | 95.07<br>±0.20        | 90.51<br>±0.19        | 93.50<br>±0.21        | 77.68<br>±0.20        |
| Mish                | 85.78<br>±0.17        | 91.96<br>±0.15        | 93.29<br>±0.17        | 94.49<br>±0.16        | 95.03<br>±0.13        | 95.39<br>±0.16        | 91.14<br>±0.16        | 93.77<br>±0.17        | <b>77.79</b><br>±0.15 |

Table 7. Comparison between SMU, SMU-1 activations and other baseline activations on CIFAR10 dataset for image classification problem. We report Top-1 test accuracy (in %) for the mean of 15 different runs. mean±std is reported in the table.

| Activation Function | MNIST               | Fashion MNIST       | SVHN                |
|---------------------|---------------------|---------------------|---------------------|
| ReLU                | 99.41 ± 0.09        | 92.97 ± 0.16        | 94.48 ± 0.14        |
| Leaky ReLU          | 99.40 ± 0.07        | 93.17 ± 0.14        | 94.59 ± 0.18        |
| ReLU6               | 99.46 ± 0.07        | 93.35 ± 0.16        | 94.61 ± 0.12        |
| PReLU               | 99.37 ± 0.11        | 93.18 ± 0.13        | 94.58 ± 0.15        |
| ELU                 | 99.49 ± 0.07        | 93.24 ± 0.14        | 94.57 ± 0.15        |
| Softplus            | 99.21 ± 0.14        | 92.99 ± 0.24        | 94.34 ± 0.22        |
| GELU                | 99.52 ± 0.05        | 93.39 ± 0.14        | 94.87 ± 0.10        |
| Swish               | 99.54 ± 0.07        | 93.34 ± 0.15        | 94.84 ± 0.14        |
| PAU                 | 99.55 ± 0.12        | 93.37 ± 0.17        | 94.79 ± 0.14        |
| Mish                | <b>99.64</b> ± 0.06 | 93.43 ± 0.12        | 94.87 ± 0.10        |
| SMU                 | 99.61 ± 0.06        | <b>93.61</b> ± 0.09 | <b>95.06</b> ± 0.10 |
| SMU-1               | 99.57 ± 0.07        | <b>93.49</b> ± 0.11 | <b>95.18</b> ± 0.12 |

Table 8. Comparison between SMU, SMU-1 activations and other baseline activations on MNIST, Fashion MNIST, and SVHN datasets for image classification problem on custom designed architecture. We report Top-1 test accuracy (in %) for the mean of 15 different runs. mean±std is reported in the table.

| Activation Function | SF V2 0.5x   | SF V2 1.0x   | SF V2 1.5x   | SF V2 2.0x   | SeNet 18     | SeNet 34     | SeNet 50     | Res-Next     | Xception     | EfficientNet B0 |
|---------------------|--------------|--------------|--------------|--------------|--------------|--------------|--------------|--------------|--------------|-----------------|
| Leaky ReLU          | 88.32 ± 0.24 | 91.20 ± 0.26 | 91.24 ± 0.24 | 91.70 ± 0.24 | 94.18 ± 0.24 | 94.52 ± 0.23 | 94.51 ± 0.21 | 93.25 ± 0.20 | 90.81 ± 0.25 | 95.35 ± 0.15    |
| ReLU6               | 88.52 ± 0.22 | 91.15 ± 0.23 | 91.32 ± 0.20 | 91.64 ± 0.22 | 94.39 ± 0.22 | 94.50 ± 0.24 | 94.61 ± 0.22 | 93.49 ± 0.21 | 91.20 ± 0.22 | 95.40 ± 0.16    |
| PReLU               | 88.28 ± 0.24 | 91.02 ± 0.22 | 91.29 ± 0.24 | 91.77 ± 0.24 | 94.35 ± 0.24 | 94.57 ± 0.25 | 94.62 ± 0.24 | 93.35 ± 0.24 | 91.07 ± 0.23 | 95.37 ± 0.19    |
| ELU                 | 88.20 ± 0.22 | 91.17 ± 0.26 | 91.40 ± 0.22 | 91.81 ± 0.24 | 94.22 ± 0.22 | 94.42 ± 0.24 | 94.71 ± 0.22 | 93.52 ± 0.23 | 91.45 ± 0.22 | 95.19 ± 0.19    |
| Softplus            | 87.95 ± 0.30 | 90.42 ± 0.30 | 91.01 ± 0.28 | 91.00 ± 0.30 | 93.82 ± 0.29 | 94.05 ± 0.30 | 94.22 ± 0.27 | 93.10 ± 0.29 | 90.56 ± 0.27 | 95.07 ± 0.25    |
| GELU                | 88.92 ± 0.20 | 91.62 ± 0.24 | 91.77 ± 0.20 | 92.29 ± 0.19 | 94.49 ± 0.20 | 94.77 ± 0.20 | 94.79 ± 0.16 | 93.61 ± 0.20 | 91.99 ± 0.22 | 95.45 ± 0.15    |
| Swish               | 89.04 ± 0.20 | 91.71 ± 0.22 | 91.81 ± 0.20 | 92.20 ± 0.19 | 94.30 ± 0.18 | 94.69 ± 0.18 | 94.55 ± 0.17 | 93.61 ± 0.19 | 91.69 ± 0.19 | 95.56 ± 0.16    |
| PAU                 | 89.18 ± 0.21 | 91.70 ± 0.24 | 92.20 ± 0.20 | 92.31 ± 0.19 | 94.32 ± 0.21 | 94.77 ± 0.22 | 94.70 ± 0.20 | 93.50 ± 0.19 | 91.91 ± 0.22 | 95.49 ± 0.15    |
| Mish                | 89.42 ± 0.20 | 91.98 ± 0.18 | 92.18 ± 0.17 | 92.47 ± 0.18 | 94.49 ± 0.19 | 94.81 ± 0.18 | 94.97 ± 0.15 | 93.89 ± 0.17 | 92.07 ± 0.20 | 95.70 ± 0.12    |

Table 9. This is an extension to the Table-3. We report Top-1 test accuracy (in %) on CIFAR10 dataset for baseline functions for the mean of 15 different runs. mean±std is reported in the table. SF V2 stands for ShuffleNet v2.

| Activation Function | ShuffleNet V2 (2.0x)    | ResNet-50               | Xception                | AlexNet                 | MobileNet V2            |
|---------------------|-------------------------|-------------------------|-------------------------|-------------------------|-------------------------|
| ReLU                | 70.21 $\pm$ 0.23        | 75.61 $\pm$ 0.26        | 72.10 $\pm$ 0.20        | 55.80 $\pm$ 0.27        | 75.72 $\pm$ 0.23        |
| Leaky ReLU          | 70.09 $\pm$ 0.25        | 75.74 $\pm$ 0.27        | 72.22 $\pm$ 0.22        | 56.10 $\pm$ 0.28        | 75.81 $\pm$ 0.25        |
| PReLU               | 70.17 $\pm$ 0.24        | 75.82 $\pm$ 0.28        | 72.18 $\pm$ 0.24        | 56.52 $\pm$ 0.26        | 75.98 $\pm$ 0.27        |
| ReLU6               | 70.21 $\pm$ 0.23        | 76.14 $\pm$ 0.25        | 72.35 $\pm$ 0.19        | 56.69 $\pm$ 0.26        | 75.87 $\pm$ 0.22        |
| ELU                 | 70.34 $\pm$ 0.24        | 76.15 $\pm$ 0.26        | 72.41 $\pm$ 0.23        | 56.97 $\pm$ 0.25        | 75.79 $\pm$ 0.25        |
| Softplus            | 69.91 $\pm$ 0.26        | 75.51 $\pm$ 0.30        | 71.94 $\pm$ 0.26        | 55.65 $\pm$ 0.35        | 75.60 $\pm$ 0.27        |
| Swish               | 73.64 $\pm$ 0.21        | 76.80 $\pm$ 0.24        | 73.45 $\pm$ 0.20        | 58.77 $\pm$ 0.24        | 76.67 $\pm$ 0.21        |
| Mish                | 74.25 $\pm$ 0.22        | 77.30 $\pm$ 0.24        | 74.34 $\pm$ 0.21        | 59.87 $\pm$ 0.25        | 77.02 $\pm$ 0.22        |
| GELU                | 73.51 $\pm$ 0.21        | 76.85 $\pm$ 0.25        | 73.71 $\pm$ 0.18        | 58.50 $\pm$ 0.26        | 76.61 $\pm$ 0.22        |
| PAU                 | 73.85 $\pm$ 0.20        | 77.07 $\pm$ 0.24        | 73.87 $\pm$ 0.20        | 58.80 $\pm$ 0.25        | 76.81 $\pm$ 0.21        |
| SMU                 | <b>75.78</b> $\pm$ 0.20 | <b>78.71</b> $\pm$ 0.24 | <b>75.30</b> $\pm$ 0.18 | <b>62.42</b> $\pm$ 0.23 | <b>77.83</b> $\pm$ 0.20 |
| SMU-1               | <b>75.01</b> $\pm$ 0.21 | <b>77.81</b> $\pm$ 0.24 | <b>74.84</b> $\pm$ 0.20 | <b>61.93</b> $\pm$ 0.25 | <b>77.49</b> $\pm$ 0.22 |

Table 10. Comparison between SMU, SMU-1 activations and other baseline activations on CIFAR100 dataset for image classification problem with Mixup augmentation method. We report Top-1 test accuracy (in %) for the mean of 15 different runs. mean $\pm$ std is reported in the table.

| Activation Function | ShuffleNet V2 (1.0x) | ResNet-50    |
|---------------------|----------------------|--------------|
| ReLU                | 69.21                | 75.52        |
| Leaky ReLU          | 69.28                | 75.67        |
| PReLU               | 69.01                | 75.40        |
| ReLU6               | 69.45                | 75.70        |
| ELU                 | 69.49                | 75.62        |
| Softplus            | 69.01                | 75.30        |
| Swish               | 70.35                | 76.06        |
| Mish                | 70.53                | 76.45        |
| GELU                | 70.12                | 76.01        |
| PAU                 | 70.28                | 76.14        |
| SMU                 | <b>71.93</b>         | <b>77.48</b> |
| SMU-1               | <b>71.17</b>         | <b>76.89</b> |

Table 11. Top-1 accuracy reported on ImageNet-1k dataset.
